# Supplementary material for: Interactions of NADP-Reducing Enzymes Across Varying Environmental Conditions: A Model of Biological Complexity
Source: PubMed Central journal article supplement (PMC3516483; doi:10.1534/g3.112.003715), 2012-12-01
Supplement: supp_2.12.1613_003715SI.pdf [file supp_2.12.1613_003715SI.pdf]

**Table S1 Response to 50% reduction in glucose-6-phosphate dehydrogenase (G6PD) activity**

| Environmental Condition | Enzyme/<br>Metabolite | Percent<br>Difference | Elasticity Coefficient | F-ratio<br>From ANCOVA <sup>a</sup> |
|-------------------------|-----------------------|-----------------------|------------------------|-------------------------------------|
| Control                 | IDH                   | NS                    | NS                     | NS                                  |
|                         | MEN                   | +17.9%                | -0.23 ± 0.072          | <i>F</i> = 47.0, <i>P</i> < 0.0001  |
|                         | CARB                  | -11.3%                | +0.24 ± 0.085          | <i>F</i> = 28.6, <i>P</i> < 0.0001  |
|                         | TRIG                  | NS                    | NS                     | NS                                  |
| Oxidative Stress        | IDH                   | NS                    | NS                     | NS                                  |
|                         | MEN                   | +40.0%                | -0.51 ± 0.090          | <i>F</i> = 89.6, <i>P</i> < 0.0001  |
|                         | CARB                  | +13.2%                | -0.18 ± 0.057          | <i>F</i> = 10.2, <i>P</i> < 0.0019  |
|                         | TRIG                  | NS                    | NS                     | NS                                  |
| Starvation              | IDH                   | +5.3%                 | -0.06 ± 0.046          | <i>F</i> = 7.9, <i>P</i> < 0.0059   |
|                         | MEN                   | +21.8%                | -0.30 ± 0.093          | <i>F</i> = 44.1, <i>P</i> < 0.0001  |
|                         | CARB                  | -16.1%                | +0.22 ± 0.021          | <i>F</i> = 4.8, <i>P</i> < 0.0304   |
|                         | TRIG                  | NS                    | NS                     | NS                                  |
| Desiccation             | IDH                   | +3.3%                 | -0.04 ± 0.036          | <i>F</i> = 5.2, <i>P</i> < 0.0239   |
|                         | MEN                   | +23.4%                | -0.23 ± 0.050          | <i>F</i> = 40.6, <i>P</i> < 0.0001  |
|                         | CARB                  | -17.6%                | +0.28 ± 0.097          | <i>F</i> = 7.6, <i>P</i> < 0.0070   |
|                         | TRIG                  | NS                    | NS                     | NS                                  |

<sup>a</sup> Degrees of freedom for *F* ratio: *F*<sub>1,111</sub>

Abbreviations: IDH – Isocitrate dehydrogenase, MEN – Malic enzyme, CARB – Total carbohydrate concentration, TRIG – Triglyceride concentration, NS – Not significant

**Table S2 Response to 50% reduction in isocitrate dehydrogenase (IDH) activity**

| Environmental Condition | Enzyme/<br>Metabolite | Percent Difference | Elasticity Coefficient | F-ratio<br>From ANCOVA <sup>a</sup> |
|-------------------------|-----------------------|--------------------|------------------------|-------------------------------------|
| Control                 | G6PD                  | NS                 | NS                     | NS                                  |
|                         | MEN                   | NS                 | NS                     | NS                                  |
|                         | CARB                  | +7.9%              | -0.15 ± 0.066          | $F = 8.6, P < 0.0042$               |
|                         | TRIG                  | NS                 | NS                     | NS                                  |
| Oxidative Stress        | G6PD                  | +6.3%              | -0.09 ± 0.046          | $F = 12.9, P < 0.0005$              |
|                         | MEN                   | +21.2%             | -0.26 ± 0.057          | $F = 36.4, P < 0.0001$              |
|                         | CARB                  | +28.4%             | -0.38 ± 0.084          | $F = 32.3, P < 0.0001$              |
|                         | TRIG                  | NS                 | NS                     | NS                                  |
| Starvation              | G6PD                  | NS                 | NS                     | NS                                  |
|                         | MEN                   | NS                 | NS                     | NS                                  |
|                         | CARB                  | +25.3%             | -0.33 ± 0.082          | $F = 36.6, P < 0.0001$              |
|                         | TRIG                  | NS                 | NS                     | NS                                  |
| Desiccation             | G6PD                  | NS                 | NS                     | NS                                  |
|                         | MEN                   | -6.6%              | +0.05 ± 0.055          | $F = 10.4, P < 0.0017$              |
|                         | CARB                  | +36.0%             | -0.39 ± 0.057          | $F = 45.4, P < 0.0001$              |
|                         | TRIG                  | NS                 | NS                     | NS                                  |

<sup>a</sup>. Degrees of freedom for  $F$  ratio:  $F_{1,111}$

Abbreviations: G6PD – Glucose-6-phosphate dehydrogenase, MEN – Malic enzyme, CARB – Total carbohydrate concentration, TRIG – Triglyceride concentration, NS – Not significant

**Table S3 Response to 50% reduction in malic enzyme (MEN) activity**

| Environmental Condition | Enzyme/<br>Metabolite | Percent<br>Difference | Elasticity Coefficient | F-ratio<br>From ANCOVA <sup>a</sup> |
|-------------------------|-----------------------|-----------------------|------------------------|-------------------------------------|
| Control                 | G6PD                  | NS                    | NS                     | NS                                  |
|                         | IDH                   | +9.5%                 | -0.22 ± 0.060          | <i>F</i> = 11.1, <i>P</i> < 0.0012  |
|                         | CARB                  | -15.8%                | +0.62 ± 0.096          | <i>F</i> = 24.2, <i>P</i> < 0.0001  |
|                         | TRIG                  | NS                    | NS                     | NS                                  |
| Oxidative Stress        | G6PD                  | NS                    | NS                     | NS                                  |
|                         | IDH                   | +15.9%                | -0.50 ± 0.163          | <i>F</i> = 34.0, <i>P</i> < 0.0001  |
|                         | CARB                  | NS                    | NS                     | NS                                  |
|                         | TRIG                  | NS                    | NS                     | NS                                  |
| Starvation              | G6PD                  | +12.1%                | -0.86 ± 0.557          | <i>F</i> = 9.7, <i>P</i> < 0.0024   |
|                         | IDH                   | +18.8%                | -1.02 ± 0.431          | <i>F</i> = 10.1, <i>P</i> < 0.0020  |
|                         | CARB                  | -34.9%                | +1.03 ± 0.200          | <i>F</i> = 35.4, <i>P</i> < 0.0001  |
|                         | TRIG                  | -14.4%                | +0.74 ± 0.164          | <i>F</i> = 6.0, <i>P</i> < 0.0158   |
| Desiccation             | G6PD                  | +5.1%                 | -0.18 ± 0.092          | <i>F</i> = 7.1, <i>P</i> < 0.0087   |
|                         | IDH                   | +9.5%                 | -0.29 ± 0.132          | <i>F</i> = 66.0, <i>P</i> < 0.0001  |
|                         | CARB                  | -21.7%                | +1.21 ± 0.203          | <i>F</i> = 57.3, <i>P</i> < 0.0001  |
|                         | TRIG                  | NS                    | NS                     | NS                                  |

<sup>a</sup>. Degrees of freedom for *F* ratio: *F*<sub>1,111</sub>

Abbreviations: G6PD – Glucose-6-phosphate dehydrogenase, IDH – Isocitrate dehydrogenase, CARB – Total carbohydrate concentration, TRIG – Triglyceride concentration, NS – Not significant
