# Supplementary material for: Interactions of NADP-Reducing Enzymes Across Varying Environmental Conditions: A Model of Biological Complexity
Source: PubMed Central journal article supplement (PMC3516483; doi:10.1534/g3.112.003715), 2012-12-01
Supplement: supp_2.12.1613_TableS1.pdf [file supp_2.12.1613_TableS1.pdf]

**Table S1 Response to 50% reduction in glucose-6-phosphate dehydrogenase (G6PD) activity**

| Environmental Condition | Enzyme/<br>Metabolite | Percent<br>Difference | Elasticity Coefficient | F-ratio<br>From ANCOVA <sup>a</sup> |
|-------------------------|-----------------------|-----------------------|------------------------|-------------------------------------|
| Control                 | IDH                   | NS                    | NS                     | NS                                  |
|                         | MEN                   | +17.9%                | -0.23 ± 0.072          | $F = 47.0, P < 0.0001$              |
|                         | CARB                  | -11.3%                | +0.24 ± 0.085          | $F = 28.6, P < 0.0001$              |
|                         | TRIG                  | NS                    | NS                     | NS                                  |
| Oxidative Stress        | IDH                   | NS                    | NS                     | NS                                  |
|                         | MEN                   | +40.0%                | -0.51 ± 0.090          | $F = 89.6, P < 0.0001$              |
|                         | CARB                  | +13.2%                | -0.18 ± 0.057          | $F = 10.2, P < 0.0019$              |
|                         | TRIG                  | NS                    | NS                     | NS                                  |
| Starvation              | IDH                   | +5.3%                 | -0.06 ± 0.046          | $F = 7.9, P < 0.0059$               |
|                         | MEN                   | +21.8%                | -0.30 ± 0.093          | $F = 44.1, P < 0.0001$              |
|                         | CARB                  | -16.1%                | +0.22 ± 0.021          | $F = 4.8, P < 0.0304$               |
|                         | TRIG                  | NS                    | NS                     | NS                                  |
| Desiccation             | IDH                   | +3.3%                 | -0.04 ± 0.036          | $F = 5.2, P < 0.0239$               |
|                         | MEN                   | +23.4%                | -0.23 ± 0.050          | $F = 40.6, P < 0.0001$              |
|                         | CARB                  | -17.6%                | +0.28 ± 0.097          | $F = 7.6, P < 0.0070$               |
|                         | TRIG                  | NS                    | NS                     | NS                                  |

<sup>a</sup> Degrees of freedom for  $F$  ratio:  $F_{1,111}$

Abbreviations: IDH – Isocitrate dehydrogenase, MEN – Malic enzyme, CARB – Total carbohydrate concentration, TRIG – Triglyceride concentration, NS – Not significant
