# Supplementary material for: Interactions of NADP-Reducing Enzymes Across Varying Environmental Conditions: A Model of Biological Complexity
Source: PubMed Central journal article supplement (PMC3516483; doi:10.1534/g3.112.003715), 2012-12-01
Supplement: supp_2.12.1613_TableS2.pdf [file supp_2.12.1613_TableS2.pdf]

**Table S2 Response to 50% reduction in isocitrate dehydrogenase (IDH) activity**

| Environmental Condition | Enzyme/<br>Metabolite | Percent Difference | Elasticity Coefficient | F-ratio<br>From ANCOVA <sup>a</sup> |
|-------------------------|-----------------------|--------------------|------------------------|-------------------------------------|
| Control                 | G6PD                  | NS                 | NS                     | NS                                  |
|                         | MEN                   | NS                 | NS                     | NS                                  |
|                         | CARB                  | +7.9%              | -0.15 ± 0.066          | $F = 8.6, P < 0.0042$               |
|                         | TRIG                  | NS                 | NS                     | NS                                  |
| Oxidative Stress        | G6PD                  | +6.3%              | -0.09 ± 0.046          | $F = 12.9, P < 0.0005$              |
|                         | MEN                   | +21.2%             | -0.26 ± 0.057          | $F = 36.4, P < 0.0001$              |
|                         | CARB                  | +28.4%             | -0.38 ± 0.084          | $F = 32.3, P < 0.0001$              |
|                         | TRIG                  | NS                 | NS                     | NS                                  |
| Starvation              | G6PD                  | NS                 | NS                     | NS                                  |
|                         | MEN                   | NS                 | NS                     | NS                                  |
|                         | CARB                  | +25.3%             | -0.33 ± 0.082          | $F = 36.6, P < 0.0001$              |
|                         | TRIG                  | NS                 | NS                     | NS                                  |
| Desiccation             | G6PD                  | NS                 | NS                     | NS                                  |
|                         | MEN                   | -6.6%              | +0.05 ± 0.055          | $F = 10.4, P < 0.0017$              |
|                         | CARB                  | +36.0%             | -0.39 ± 0.057          | $F = 45.4, P < 0.0001$              |
|                         | TRIG                  | NS                 | NS                     | NS                                  |

<sup>a</sup>. Degrees of freedom for  $F$  ratio:  $F_{1,111}$

Abbreviations: G6PD – Glucose-6-phosphate dehydrogenase, MEN – Malic enzyme, CARB – Total carbohydrate concentration, TRIG – Triglyceride concentration, NS – Not significant
