# Supplementary material for: Interactions of NADP-Reducing Enzymes Across Varying Environmental Conditions: A Model of Biological Complexity
Source: PubMed Central journal article supplement (PMC3516483; doi:10.1534/g3.112.003715), 2012-12-01
Supplement: supp_2.12.1613_TableS3.pdf [file supp_2.12.1613_TableS3.pdf]

**Table S3 Response to 50% reduction in malic enzyme (MEN) activity**

| Environmental Condition | Enzyme/<br>Metabolite | Percent<br>Difference | Elasticity Coefficient | F-ratio<br>From ANCOVA <sup>a</sup> |
|-------------------------|-----------------------|-----------------------|------------------------|-------------------------------------|
| Control                 | G6PD                  | NS                    | NS                     | NS                                  |
|                         | IDH                   | +9.5%                 | -0.22 ± 0.060          | $F = 11.1, P < 0.0012$              |
|                         | CARB                  | -15.8%                | +0.62 ± 0.096          | $F = 24.2, P < 0.0001$              |
|                         | TRIG                  | NS                    | NS                     | NS                                  |
| Oxidative Stress        | G6PD                  | NS                    | NS                     | NS                                  |
|                         | IDH                   | +15.9%                | -0.50 ± 0.163          | $F = 34.0, P < 0.0001$              |
|                         | CARB                  | NS                    | NS                     | NS                                  |
|                         | TRIG                  | NS                    | NS                     | NS                                  |
| Starvation              | G6PD                  | +12.1%                | -0.86 ± 0.557          | $F = 9.7, P < 0.0024$               |
|                         | IDH                   | +18.8%                | -1.02 ± 0.431          | $F = 10.1, P < 0.0020$              |
|                         | CARB                  | -34.9%                | +1.03 ± 0.200          | $F = 35.4, P < 0.0001$              |
|                         | TRIG                  | -14.4%                | +0.74 ± 0.164          | $F = 6.0, P < 0.0158$               |
| Desiccation             | G6PD                  | +5.1%                 | -0.18 ± 0.092          | $F = 7.1, P < 0.0087$               |
|                         | IDH                   | +9.5%                 | -0.29 ± 0.132          | $F = 66.0, P < 0.0001$              |
|                         | CARB                  | -21.7%                | +1.21 ± 0.203          | $F = 57.3, P < 0.0001$              |
|                         | TRIG                  | NS                    | NS                     | NS                                  |

<sup>a</sup>. Degrees of freedom for  $F$  ratio:  $F_{1,111}$

Abbreviations: G6PD – Glucose-6-phosphate dehydrogenase, IDH – Isocitrate dehydrogenase, CARB – Total carbohydrate concentration, TRIG – Triglyceride concentration, NS – Not significant
